# Supplementary material for: MHC-II antigen presentation on cancer cells improves CD4+ T cell immunity and vaccine efficacy
Source: Research Square preprint supplement (doi:10.21203/rs.3.rs-8264567/v1), 2025-12-18
Supplement: Supplementary file 1 [file 25807f310fa2c8e571f92cbd.xlsx]

## Sheet: Stats  Fig 2G
Šídák's multiple comparisons test	mRpl18 vs. mRpl18+mItgb1
4 IRs	Predicted (LS) mean diff.	95.00% CI of diff.	Below threshold?	Summary	Adjusted P Value
5 weeks	23.15	12.92 to 33.39	Yes	****	<0.0001
8 weeks	21.09	11.01 to 31.18	Yes	****	<0.0001
10 weeks	9.69	-0.7786 to 20.16	No	ns	0.081
12 weeks	-4.1	-17.86 to 9.659	No	ns	0.9102
3 IRs	Predicted (LS) mean diff.	95.00% CI of diff.	Below threshold?	Summary	Adjusted P Value
5 weeks	4.894	0.3910 to 9.397	Yes	*	0.0274
8 weeks	12.74	8.306 to 17.18	Yes	****	<0.0001
10 weeks	8.638	4.032 to 13.24	Yes	****	<0.0001
12 weeks	3.729	-2.324 to 9.782	No	ns	0.4053
2 IRs	Predicted (LS) mean diff.	95.00% CI of diff.	Below threshold?	Summary	Adjusted P Value
5 weeks	-8.867	-13.90 to -3.834	Yes	****	<0.0001
8 weeks	-3.72	-8.679 to 1.239	No	ns	0.2199
10 weeks	-6.52	-11.67 to -1.373	Yes	**	0.007
12 weeks	0.9252	-5.840 to 7.691	No	ns	0.9947
1 IRs	Predicted (LS) mean diff.	95.00% CI of diff.	Below threshold?	Summary	Adjusted P Value
5 weeks	-10.14	-15.06 to -5.208	Yes	****	<0.0001
8 weeks	-12.9	-17.76 to -8.047	Yes	****	<0.0001
10 weeks	-10.24	-15.28 to -5.205	Yes	****	<0.0001
12 weeks	-0.2301	-6.854 to 6.393	No	ns	>0.9999
0 IRs	Predicted (LS) mean diff.	95.00% CI of diff.	Below threshold?	Summary	Adjusted P Value
5 weeks	-8.349	-14.66 to -2.035	Yes	**	0.0044
8 weeks	-16.68	-22.90 to -10.46	Yes	****	<0.0001
10 weeks	-3.819	-10.28 to 2.638	No	ns	0.4461
12 weeks	-0.3248	-8.812 to 8.162	No	ns	>0.9999

## Sheet: Stats Ext. Fig 4C
Two-Way ANOVA: Tukey's multiple comparisons test	5 weeks vs. 8 weeks vs. 10 weeks for Cytokine profiles
Number of families	6
Number of comparisons per family	3
Alpha	0.05
Tukey's multiple comparisons test	Predicted (LS) mean diff.	95.00% CI of diff.	Below threshold?	Summary	Adjusted P Value
IFNy
5 weeks vs. 8 weeks	-5.53	-16.26 to 5.203	No	ns	0.4428
5 weeks vs. 10 weeks	-14.91	-25.64 to -4.179	Yes	**	0.0036
8 weeks vs. 10 weeks	-9.382	-20.43 to 1.663	No	ns	0.1129
TNFa
5 weeks vs. 8 weeks	0.6615	-10.07 to 11.39	No	ns	0.9883
5 weeks vs. 10 weeks	-22.36	-33.10 to -11.63	Yes	****	<0.0001
8 weeks vs. 10 weeks	-23.03	-34.07 to -11.98	Yes	****	<0.0001
IL2
5 weeks vs. 8 weeks	7.864	-2.869 to 18.60	No	ns	0.1954
5 weeks vs. 10 weeks	-2.653	-13.39 to 8.080	No	ns	0.8279
8 weeks vs. 10 weeks	-10.52	-21.56 to 0.5268	No	ns	0.0656
IL-17A/F
5 weeks vs. 8 weeks	10.78	0.04596 to 21.51	Yes	*	0.0488
5 weeks vs. 10 weeks	8.535	-2.198 to 19.27	No	ns	0.1471
8 weeks vs. 10 weeks	-2.244	-13.29 to 8.800	No	ns	0.8801
IL-4
5 weeks vs. 8 weeks	-2.127	-12.86 to 8.606	No	ns	0.8856
5 weeks vs. 10 weeks	-4.278	-15.01 to 6.455	No	ns	0.6129
8 weeks vs. 10 weeks	-2.151	-13.20 to 8.893	No	ns	0.8893
Test details	Predicted (LS) mean 1	Predicted (LS) mean 2	Predicted (LS) mean diff.	SE of diff.	N1	N2	q	DF
IFNy
5 weeks vs. 8 weeks	22.21	27.74	-5.53	4.528	9	8	1.727	132
5 weeks vs. 10 weeks	22.21	37.12	-14.91	4.528	9	8	4.657	132
8 weeks vs. 10 weeks	27.74	37.12	-9.382	4.659	8	8	2.848	132
TNFa
5 weeks vs. 8 weeks	38.91	38.25	0.6615	4.528	9	8	0.2066	132
5 weeks vs. 10 weeks	38.91	61.28	-22.36	4.528	9	8	6.985	132
8 weeks vs. 10 weeks	38.25	61.28	-23.03	4.659	8	8	6.989	132
IL2
5 weeks vs. 8 weeks	14.62	6.761	7.864	4.528	9	8	2.456	132
5 weeks vs. 10 weeks	14.62	17.28	-2.653	4.528	9	8	0.8287	132
8 weeks vs. 10 weeks	6.761	17.28	-10.52	4.659	8	8	3.192	132
IL-17A/F
5 weeks vs. 8 weeks	14.93	4.153	10.78	4.528	9	8	3.367	132
5 weeks vs. 10 weeks	14.93	6.398	8.535	4.528	9	8	2.666	132
8 weeks vs. 10 weeks	4.153	6.398	-2.244	4.659	8	8	0.6812	132
IL-4
5 weeks vs. 8 weeks	0.9748	3.102	-2.127	4.528	9	8	0.6644	132
5 weeks vs. 10 weeks	0.9748	5.253	-4.278	4.528	9	8	1.336	132
8 weeks vs. 10 weeks	3.102	5.253	-2.151	4.659	8	8	0.6529	132

## Sheet: Stats Ext. Fig 10 L 
Dunn's multiple comparisons test	"Lung Vasculatiure" (mRpl18-tetramer+ CD8a+ T cells)							Dunn's multiple comparisons test	"Recently Recruited" (mRpl18-tetramer+ CD8a+ T cells)							Dunn's multiple comparisons test	"In tissue" (mRpl18-tetramer+ CD8a+ T cells)
4+ IRs comparison	Mean rank diff.	Significant?	Summary	Adjusted P Value				4+ IRs comparison	Mean rank diff.	Significant?	Summary	Adjusted P Value				4+ IRs comparison	Mean rank diff.	Significant?	Summary	Adjusted P Value
Ctrl Vax vs. CD8 Vax	23.47	Yes	***	0.0003	A-B			Ctrl Vax vs. CD8 Vax	11.69	No	ns	0.158	A-B			Ctrl Vax vs. CD8 Vax	-10.1	No	ns	0.2593	A-B
Ctrl Vax vs. CD8+CD4 Vax	24.1	Yes	***	0.0002	A-C			Ctrl Vax vs. CD8+CD4 Vax	15.08	Yes	*	0.0396	A-C			Ctrl Vax vs. CD8+CD4 Vax	-9.542	No	ns	0.2851	A-C
CD8 Vax vs. CD8+CD4 Vax	0.6283	No	ns	>0.9999	B-C			CD8 Vax vs. CD8+CD4 Vax	3.387	No	ns	>0.9999	B-C			CD8 Vax vs. CD8+CD4 Vax	0.5536	No	ns	>0.9999	B-C
Test details	Mean rank 1	Mean rank 2	Mean rank diff.	n1	n2	Z		Test details	Mean rank 1	Mean rank 2	Mean rank diff.	n1	n2	Z		Test details	Mean rank 1	Mean rank 2	Mean rank diff.	n1	n2	Z
Ctrl Vax vs. CD8 Vax	51.39	27.92	23.47	18	25	3.896		Ctrl Vax vs. CD8 Vax	43.41	31.72	11.69	17	25	1.938		Ctrl Vax vs. CD8 Vax	25	35.1	-10.1	18	21	1.715
Ctrl Vax vs. CD8+CD4 Vax	51.39	27.29	24.1	18	24	3.966		Ctrl Vax vs. CD8+CD4 Vax	43.41	28.33	15.08	17	24	2.478		Ctrl Vax vs. CD8+CD4 Vax	25	34.54	-9.542	18	24	1.669
CD8 Vax vs. CD8+CD4 Vax	27.92	27.29	0.6283	25	24	0.1128		CD8 Vax vs. CD8+CD4 Vax	31.72	28.33	3.387	25	24	0.6174		CD8 Vax vs. CD8+CD4 Vax	35.1	34.54	0.5536	21	24	0.1011
3+ IRs comparison	Mean rank diff.	Significant?	Summary	Adjusted P Value				3+ IRs comparison	Mean rank diff.	Significant?	Summary	Adjusted P Value				3+ IRs comparison	Mean rank diff.	Significant?	Summary	Adjusted P Value
Ctrl Vax vs. CD8 Vax	30.02	Yes	****	<0.0001	A-B			Ctrl Vax vs. CD8 Vax	7.198	No	ns	0.6989	A-B			Ctrl Vax vs. CD8 Vax	4.698	No	ns	>0.9999	A-B
Ctrl Vax vs. CD8+CD4 Vax	35.11	Yes	****	<0.0001	A-C			Ctrl Vax vs. CD8+CD4 Vax	7.951	No	ns	0.574	A-C			Ctrl Vax vs. CD8+CD4 Vax	11.35	No	ns	0.1413	A-C
CD8 Vax vs. CD8+CD4 Vax	5.093	No	ns	>0.9999	B-C			CD8 Vax vs. CD8+CD4 Vax	0.7533	No	ns	>0.9999	B-C			CD8 Vax vs. CD8+CD4 Vax	6.649	No	ns	0.6744	B-C
Test details	Mean rank 1	Mean rank 2	Mean rank diff.	n1	n2	Z		Test details	Mean rank 1	Mean rank 2	Mean rank diff.	n1	n2	Z		Test details	Mean rank 1	Mean rank 2	Mean rank diff.	n1	n2	Z
Ctrl Vax vs. CD8 Vax	57.78	27.76	30.02	18	25	4.984		Ctrl Vax vs. CD8 Vax	39.12	31.92	7.198	17	25	1.193		Ctrl Vax vs. CD8 Vax	37.89	33.19	4.698	18	21	0.798
Ctrl Vax vs. CD8+CD4 Vax	57.78	22.67	35.11	18	24	5.779		Ctrl Vax vs. CD8+CD4 Vax	39.12	31.17	7.951	17	24	1.307		Ctrl Vax vs. CD8+CD4 Vax	37.89	26.54	11.35	18	24	1.985
CD8 Vax vs. CD8+CD4 Vax	27.76	22.67	5.093	25	24	0.9147		CD8 Vax vs. CD8+CD4 Vax	31.92	31.17	0.7533	25	24	0.1373		CD8 Vax vs. CD8+CD4 Vax	33.19	26.54	6.649	21	24	1.214
2+ IRs comparison	Mean rank diff.	Significant?	Summary	Adjusted P Value				2+ IRs comparison	Mean rank diff.	Significant?	Summary	Adjusted P Value				2+ IRs comparison	Mean rank diff.	Significant?	Summary	Adjusted P Value
Ctrl Vax vs. CD8 Vax	23.25	Yes	***	0.0003	A-B			Ctrl Vax vs. CD8 Vax	-0.5365	No	ns	>0.9999	A-B			Ctrl Vax vs. CD8 Vax	12.29	No	ns	0.1108	A-B
Ctrl Vax vs. CD8+CD4 Vax	31.31	Yes	****	<0.0001	A-C			Ctrl Vax vs. CD8+CD4 Vax	4.199	No	ns	>0.9999	A-C			Ctrl Vax vs. CD8+CD4 Vax	12	No	ns	0.1073	A-C
CD8 Vax vs. CD8+CD4 Vax	8.057	No	ns	0.4438	B-C			CD8 Vax vs. CD8+CD4 Vax	4.735	No	ns	>0.9999	B-C			CD8 Vax vs. CD8+CD4 Vax	-0.2857	No	ns	>0.9999	B-C
Test details	Mean rank 1	Mean rank 2	Mean rank diff.	n1	n2	Z		Test details	Mean rank 1	Mean rank 2	Mean rank diff.	n1	n2	Z		Test details	Mean rank 1	Mean rank 2	Mean rank diff.	n1	n2	Z
Ctrl Vax vs. CD8 Vax	53.89	30.64	23.25	18	25	3.86		Ctrl Vax vs. CD8 Vax	34.82	35.36	-0.5365	17	25	0.0889		Ctrl Vax vs. CD8 Vax	40.67	28.38	12.29	18	21	2.087
Ctrl Vax vs. CD8+CD4 Vax	53.89	22.58	31.31	18	24	5.153		Ctrl Vax vs. CD8+CD4 Vax	34.82	30.63	4.199	17	24	0.69		Ctrl Vax vs. CD8+CD4 Vax	40.67	28.67	12	18	24	2.1
CD8 Vax vs. CD8+CD4 Vax	30.64	22.58	8.057	25	24	1.447		CD8 Vax vs. CD8+CD4 Vax	35.36	30.63	4.735	25	24	0.8632		CD8 Vax vs. CD8+CD4 Vax	28.38	28.67	-0.2857	21	24	0.05216
1+ IRs comparison	Mean rank diff.	Significant?	Summary	Adjusted P Value				1+ IRs comparison	Mean rank diff.	Significant?	Summary	Adjusted P Value				1+ IRs comparison	Mean rank diff.	Significant?	Summary	Adjusted P Value
Ctrl Vax vs. CD8 Vax	-14.05	No	ns	0.059	A-B			Ctrl Vax vs. CD8 Vax	-21.68	Yes	***	0.001	A-B			Ctrl Vax vs. CD8 Vax	0.5476	No	ns	>0.9999	A-B
Ctrl Vax vs. CD8+CD4 Vax	-6.611	No	ns	0.8296	A-C			Ctrl Vax vs. CD8+CD4 Vax	-17.94	Yes	**	0.0096	A-C			Ctrl Vax vs. CD8+CD4 Vax	-1.792	No	ns	>0.9999	A-C
CD8 Vax vs. CD8+CD4 Vax	7.44	No	ns	0.5445	B-C			CD8 Vax vs. CD8+CD4 Vax	3.732	No	ns	>0.9999	B-C			CD8 Vax vs. CD8+CD4 Vax	-2.339	No	ns	>0.9999	B-C
Test details	Mean rank 1	Mean rank 2	Mean rank diff.	n1	n2	Z		Test details	Mean rank 1	Mean rank 2	Mean rank diff.	n1	n2	Z		Test details	Mean rank 1	Mean rank 2	Mean rank diff.	n1	n2	Z
Ctrl Vax vs. CD8 Vax	26.39	40.44	-14.05	18	25	2.333		Ctrl Vax vs. CD8 Vax	18.76	40.44	-21.68	17	25	3.592		Ctrl Vax vs. CD8 Vax	31.5	30.95	0.5476	18	21	0.09301
Ctrl Vax vs. CD8+CD4 Vax	26.39	33	-6.611	18	24	1.088		Ctrl Vax vs. CD8+CD4 Vax	18.76	36.71	-17.94	17	24	2.949		Ctrl Vax vs. CD8+CD4 Vax	31.5	33.29	-1.792	18	24	0.3135
CD8 Vax vs. CD8+CD4 Vax	40.44	33	7.44	25	24	1.336		CD8 Vax vs. CD8+CD4 Vax	40.44	36.71	3.732	25	24	0.6803		CD8 Vax vs. CD8+CD4 Vax	30.95	33.29	-2.339	21	24	0.4271
0 IRs comparison	Mean rank diff.	Significant?	Summary	Adjusted P Value				0 IRs comparison	Mean rank diff.	Significant?	Summary	Adjusted P Value				0 IRs comparison	Mean rank diff.	Significant?	Summary	Adjusted P Value
Ctrl Vax vs. CD8 Vax	-16.95	Yes	*	0.0146	A-B			Ctrl Vax vs. CD8 Vax	-7.649	No	ns	0.6148	A-B			Ctrl Vax vs. CD8 Vax	-10	No	ns	0.2683	A-B
Ctrl Vax vs. CD8+CD4 Vax	-23.75	Yes	***	0.0003	A-C			Ctrl Vax vs. CD8+CD4 Vax	-14.11	No	ns	0.0611	A-C			Ctrl Vax vs. CD8+CD4 Vax	-12.25	No	ns	0.0963	A-C
CD8 Vax vs. CD8+CD4 Vax	-6.797	No	ns	0.6667	B-C			CD8 Vax vs. CD8+CD4 Vax	-6.463	No	ns	0.7161	B-C			CD8 Vax vs. CD8+CD4 Vax	-2.25	No	ns	>0.9999	B-C
Test details	Mean rank 1	Mean rank 2	Mean rank diff.	n1	n2	Z		Test details	Mean rank 1	Mean rank 2	Mean rank diff.	n1	n2	Z		Test details	Mean rank 1	Mean rank 2	Mean rank diff.	n1	n2	Z
Ctrl Vax vs. CD8 Vax	19.17	36.12	-16.95	18	25	2.815		Ctrl Vax vs. CD8 Vax	25.47	33.12	-7.649	17	25	1.268		Ctrl Vax vs. CD8 Vax	24	34	-10	18	21	1.698
Ctrl Vax vs. CD8+CD4 Vax	19.17	42.92	-23.75	18	24	3.909		Ctrl Vax vs. CD8+CD4 Vax	25.47	39.58	-14.11	17	24	2.319		Ctrl Vax vs. CD8+CD4 Vax	24	36.25	-12.25	18	24	2.143
CD8 Vax vs. CD8+CD4 Vax	36.12	42.92	-6.797	25	24	1.221		CD8 Vax vs. CD8+CD4 Vax	33.12	39.58	-6.463	25	24	1.178		CD8 Vax vs. CD8+CD4 Vax	34	36.25	-2.25	21	24	0.4108

## Sheet: Stats Ext. Fig 10 M 
Dunn's multiple comparisons test	"tumor-draining Lymph node" (mRpl18-tetramer+ CD8a+ T cells)							Dunn's multiple comparisons test	"Spleen" (mRpl18-tetramer+ CD8a+ T cells)
4+ IRs comparison	Mean rank diff.	Significant?	Summary	Adjusted P Value				4+ IRs comparison	Mean rank diff.	Significant?	Summary	Adjusted P Value
Ctrl Vax vs. CD8 Vax	-0.36	No	ns	>0.9999	A-B			CD8 Vax vs. CD8+CD4 Vax	-5.372	No	ns	>0.9999	B-C
Ctrl Vax vs. CD8+CD4 Vax	-1.045	No	ns	>0.9999	A-C			Test details	Mean rank 1	Mean rank 2	Mean rank diff.	n1	n2	Z
CD8 Vax vs. CD8+CD4 Vax	-0.6855	No	ns	>0.9999	B-C			CD8 Vax vs. CD8+CD4 Vax	25.42	30.79	-5.372	25	24	0.9509
Test details	Mean rank 1	Mean rank 2	Mean rank diff.	n1	n2	Z
Ctrl Vax vs. CD8 Vax	32	32.36	-0.36	17	25	0.06151		3+ IRs comparison	Mean rank diff.	Significant?	Summary	Adjusted P Value
Ctrl Vax vs. CD8+CD4 Vax	32	33.05	-1.045	17	22	0.1739		CD8 Vax vs. CD8+CD4 Vax	-2.122	No	ns	>0.9999	B-C
CD8 Vax vs. CD8+CD4 Vax	32.36	33.05	-0.6855	25	22	0.1259		Test details	Mean rank 1	Mean rank 2	Mean rank diff.	n1	n2	Z
3+ IRs comparison	Mean rank diff.	Significant?	Summary	Adjusted P Value				CD8 Vax vs. CD8+CD4 Vax	25.92	28.04	-2.122	25	24	0.3755
Ctrl Vax vs. CD8 Vax	0.7953	No	ns	>0.9999	A-B
Ctrl Vax vs. CD8+CD4 Vax	1.235	No	ns	>0.9999	A-C			2+ IRs comparison	Mean rank diff.	Significant?	Summary	Adjusted P Value
CD8 Vax vs. CD8+CD4 Vax	0.44	No	ns	>0.9999	B-C			CD8 Vax vs. CD8+CD4 Vax	-5.02	No	ns	>0.9999	B-C
Test details	Mean rank 1	Mean rank 2	Mean rank diff.	n1	n2	Z		Test details	Mean rank 1	Mean rank 2	Mean rank diff.	n1	n2	Z
Ctrl Vax vs. CD8 Vax	33.24	32.44	0.7953	17	25	0.1359		CD8 Vax vs. CD8+CD4 Vax	26.48	31.5	-5.02	25	24	0.8884
Ctrl Vax vs. CD8+CD4 Vax	33.24	32	1.235	17	22	0.2055
CD8 Vax vs. CD8+CD4 Vax	32.44	32	0.44	25	22	0.08084		1+ IRs comparison	Mean rank diff.	Significant?	Summary	Adjusted P Value
2+ IRs comparison	Mean rank diff.	Significant?	Summary	Adjusted P Value				CD8 Vax vs. CD8+CD4 Vax	-6.892	No	ns	0.6679	B-C
Ctrl Vax vs. CD8 Vax	-2.282	No	ns	>0.9999	A-B			Test details	Mean rank 1	Mean rank 2	Mean rank diff.	n1	n2	Z
Ctrl Vax vs. CD8+CD4 Vax	7.299	No	ns	0.6742	A-C			CD8 Vax vs. CD8+CD4 Vax	25.4	32.29	-6.892	25	24	1.22
CD8 Vax vs. CD8+CD4 Vax	9.582	No	ns	0.235	B-C
Test details	Mean rank 1	Mean rank 2	Mean rank diff.	n1	n2	Z		0 IRs comparison	Mean rank diff.	Significant?	Summary	Adjusted P Value
Ctrl Vax vs. CD8 Vax	34.12	36.4	-2.282	17	25	0.3899		CD8 Vax vs. CD8+CD4 Vax	6.405	No	ns	0.771	B-C
Ctrl Vax vs. CD8+CD4 Vax	34.12	26.82	7.299	17	22	1.214		Test details	Mean rank 1	Mean rank 2	Mean rank diff.	n1	n2	Z
CD8 Vax vs. CD8+CD4 Vax	36.4	26.82	9.582	25	22	1.76		CD8 Vax vs. CD8+CD4 Vax	45.28	38.88	6.405	25	24	1.133
1+ IRs comparison	Mean rank diff.	Significant?	Summary	Adjusted P Value
Ctrl Vax vs. CD8 Vax	2.115	No	ns	>0.9999	A-B
Ctrl Vax vs. CD8+CD4 Vax	-3.174	No	ns	>0.9999	A-C
CD8 Vax vs. CD8+CD4 Vax	-5.289	No	ns	0.9935	B-C
Test details	Mean rank 1	Mean rank 2	Mean rank diff.	n1	n2	Z
Ctrl Vax vs. CD8 Vax	32.24	30.12	2.115	17	25	0.3614
Ctrl Vax vs. CD8+CD4 Vax	32.24	35.41	-3.174	17	22	0.5279
CD8 Vax vs. CD8+CD4 Vax	30.12	35.41	-5.289	25	22	0.9718
0 IRs comparison	Mean rank diff.	Significant?	Summary	Adjusted P Value
Ctrl Vax vs. CD8 Vax	3.947	No	ns	>0.9999	A-B
Ctrl Vax vs. CD8+CD4 Vax	-4.057	No	ns	>0.9999	A-C
CD8 Vax vs. CD8+CD4 Vax	-8.005	No	ns	0.4241	B-C
Test details	Mean rank 1	Mean rank 2	Mean rank diff.	n1	n2	Z
Ctrl Vax vs. CD8 Vax	32.65	28.7	3.947	17	25	0.6744
Ctrl Vax vs. CD8+CD4 Vax	32.65	36.7	-4.057	17	22	0.6749
CD8 Vax vs. CD8+CD4 Vax	28.7	36.7	-8.005	25	22	1.471

## Sheet: Stats Ext. Fig 11 F
"Lung Vasculatiure" (mRpl18-tetramer+ CD8a+ T cells)
Table Analyzed	LUNG: CD8+ TET+ 3 min IV+ IR 4+	LUNG: CD8+ TET+ 3 min IV+ IR 3+	LUNG: CD8+ TET+ 3 min IV+ IR 2+	LUNG: CD8+ TET+ 3 min IV+ IR 1+	LUNG: CD8+ TET+ 3 min IV+ IR 0
Column B	mRpl18 + mItgb1 Vax	mRpl18 + mItgb1 Vax	mRpl18 + mItgb1 Vax	mRpl18 + mItgb1 Vax	mRpl18 + mItgb1 Vax
vs.	vs.	vs.	vs.	vs.	vs.
Column A	Control Vax	Control Vax	Control Vax	Control Vax	Control Vax
Unpaired t test
P value	0.0335	0.0202	0.9892	0.013	0.949
P value summary	*	*	ns	*	ns
Significantly different (P < 0.05)?	Yes	Yes	No	Yes	No
One- or two-tailed P value?	Two-tailed	Two-tailed	Two-tailed	Two-tailed	Two-tailed
t, df	t=2.216, df=34	t=2.438, df=34	t=0.01365, df=34	t=2.621, df=34	t=0.06442, df=34
How big is the difference?
Mean of column A	7.562	7.829	9.756	24.95	49.9
Mean of column B	3.429	3.77	9.734	33.51	49.56
Difference between means (B - A) ± SEM	-4.133 ± 1.866	-4.059 ± 1.665	-0.02205 ± 1.615	8.560 ± 3.266	-0.3448 ± 5.353
95% confidence interval	-7.925 to -0.3421	-7.443 to -0.6755	-3.305 to 3.261	1.923 to 15.20	-11.22 to 10.53
R squared (eta squared)	0.1262	0.1488	5.478e-06	0.1681	0.000122
F test to compare variances
F, DFn, Dfd	2.664, 17, 17	4.227, 17, 17	3.538, 17, 17	1.193, 17, 17	1.794, 17, 17
P value	0.0508	0.0049	0.0128	0.7197	0.2381
P value summary	ns	**	*	ns	ns
Significantly different (P < 0.05)?	No	Yes	Yes	No	No
Data analyzed
Sample size, column A	18	18	18	18	18
Sample size, column B	18	18	18	18	18
"Recently Recruited" (mRpl18-tetramer+ CD8a+ T cells)
Table Analyzed	LUNG: CD8+ TET+ 24 hr IV+ IR 4+	LUNG: CD8+ TET+ 24 hr IV+ IR 3+	LUNG: CD8+ TET+ 24 hr IV+ IR 2+	LUNG: CD8+ TET+ 24 hr IV+ IR 1+	LUNG: CD8+ TET+ 24 hr IV+ IR 0
Column B	mRpl18 + mItgb1 Vax	mRpl18 + mItgb1 Vax	mRpl18 + mItgb1 Vax	mRpl18 + mItgb1 Vax	mRpl18 + mItgb1 Vax
vs.	vs.	vs.	vs.	vs.	vs.
Column A	Control Vax	Control Vax	Control Vax	Control Vax	Control Vax
Unpaired t test
P value	0.1356	0.0103	0.2609	<0.0001	0.2409
P value summary	ns	*	ns	****	ns
Significantly different (P < 0.05)?	No	Yes	No	Yes	No
One- or two-tailed P value?	Two-tailed	Two-tailed	Two-tailed	Two-tailed	Two-tailed
t, df	t=1.530, df=33	t=2.723, df=33	t=1.144, df=33	t=5.682, df=33	t=1.194, df=33
How big is the difference?
Mean of column A	30.52	34.47	13.67	6.255	15.08
Mean of column B	22.08	18.03	17.14	18.51	24.24
Difference between means (B - A) ± SEM	-8.444 ± 5.520	-16.44 ± 6.038	3.474 ± 3.037	12.26 ± 2.157	9.158 ± 7.668
95% confidence interval	-19.67 to 2.785	-28.73 to -4.158	-2.705 to 9.653	7.867 to 16.64	-6.442 to 24.76
R squared (eta squared)	0.06623	0.1835	0.03813	0.4945	0.04144
F test to compare variances
F, DFn, Dfd	2.068, 16, 17	19.65, 16, 17	3.197, 16, 17	1.737, 16, 17	1.753, 16, 17
P value	0.1477	<0.0001	0.0225	0.2688	0.2614
P value summary	ns	****	*	ns	ns
Significantly different (P < 0.05)?	No	Yes	Yes	No	No
Data analyzed
Sample size, column A	17	17	17	17	17
Sample size, column B	18	18	18	18	18
"In Tissue" (mRpl18-tetramer+ CD8a+ T cells)
Table Analyzed	LUNG: CD8+ TET+ IV- IR 4+	LUNG: CD8+ TET+ IV- IR 3+	LUNG: CD8+ TET+IV- IR 2+	LUNG: CD8+ TET+ IV- IR 1+	LUNG: CD8+ TET+ IV- IR 0
Column B	mRpl18 + mItgb1 Vax	mRpl18 + mItgb1 Vax	mRpl18 + mItgb1 Vax	mRpl18 + mItgb1 Vax	mRpl18 + mItgb1 Vax
vs.	vs.	vs.	vs.	vs.	vs.
Column A	Control Vax	Control Vax	Control Vax	Control Vax	Control Vax
Unpaired t test
P value	<0.0001	0.0016	0.0002	0.1275	0.5942
P value summary	****	**	***	ns	ns
Significantly different (P < 0.05)?	Yes	Yes	Yes	No	No
One- or two-tailed P value?	Two-tailed	Two-tailed	Two-tailed	Two-tailed	Two-tailed
t, df	t=4.760, df=34	t=3.437, df=34	t=4.164, df=34	t=1.562, df=34	t=0.5379, df=34
How big is the difference?
Mean of column A	27.85	33.17	23.83	12.05	3.102
Mean of column B	45.41	27.32	16.03	8.976	2.262
Difference between means (B - A) ± SEM	17.56 ± 3.690	-5.853 ± 1.703	-7.796 ± 1.872	-3.074 ± 1.968	-0.8400 ± 1.562
95% confidence interval	10.06 to 25.06	-9.313 to -2.392	-11.60 to -3.991	-7.073 to 0.9251	-4.014 to 2.334
R squared (eta squared)	0.3999	0.2579	0.3378	0.06697	0.008438
F test to compare variances
F, DFn, Dfd	2.151, 17, 17	1.859, 17, 17	2.039, 17, 17	1.176, 17, 17	6.748, 17, 17
P value	0.1241	0.2112	0.152	0.7416	0.0003
P value summary	ns	ns	ns	ns	***
Significantly different (P < 0.05)?	No	No	No	No	Yes
Data analyzed
Sample size, column A	18	18	18	18	18
Sample size, column B	18	18	18	18	18
